# Supplementary material for: Experiences Shared by the (Future) Public Health Workforce during the COVD-19 Pandemic in Germany: Results of A Survey on Workload, Work Content, and Related Challenges among Students and Young Professionals
Source: Preprints.org preprint supplement (doi:10.20944/preprints202208.0035.v1), 2022-08-02
Supplement: Supplementary file 3 [file supplementary]

**Supplementary materials**

**Table S1.** Experiences of students enrolled for more than 3 semesters, stratified for gender, age, number of semesters absolved, and graduation status (n=76).

|  | **Gender** | | | **Age in years** | | | | **Semesters absolved** | | | **Graduation during COVID-19 pandemic** | | |
| --- | --- | --- | --- | --- | --- | --- | --- | --- | --- | --- | --- | --- | --- |
|  | **Male** | **Female** | **SMD** | **≤27** | **28–<38** | **≥38** | **SMD** | **4-10** | **≥11** | **SMD** | **yes** | **no** | **SMD** |
| **n** | 16 | 57 |  | 43 | 29 | 4 |  | 48 | 28 |  | 21 | 53 |  |
| **Money** |  |  | 0.493 |  |  |  | 0.913 |  |  | 0.403 |  |  | 0.504 |
| very burdened | 0 (0.0) | 3 (5.5) |  | 1 (2.4) | 2 (7.1) | 0 (0.0) |  | 1 (2.2) | 2 (7.4) |  | 0 (0.0) | 3 (6.0) |  |
| burdened | 1 (5.6) | 8 (14.5) |  | 6 (14.6) | 3 (10.7) | 0 (0.0) |  | 5 (10.9) | 4 (14.8) |  | 3 (14.3) | 6 (12.0) |  |
| less burdened | 4 (22.2) | 13 (23.6) |  | 12 (29.3) | 5 (17.9) | 0 (0.0) |  | 13 (28.3) | 4 (14.8) |  | 7 (33.3) | 9 (18.0) |  |
| not burdened | 13 (72.2) | 31 (56.4) |  | 22 (53.7) | 18 (64.3) | 4 (100.0) |  | 27 (58.7) | 17 (63.0) |  | 11 (52.4) | 32 (64.0) |  |
| NA=3 |  |  |  |  |  |  |  |  |  |  |  |  |  |
| **Lecturer** |  |  | 0.511 |  |  |  | 1.045 |  |  | 0.182 |  |  | 0.436 |
| very burdened | 5 (27.8) | 15 (26.3) |  | 14 (32.6) | 6 (21.4) | 0 (0.0) |  | 12 (25.0) | 8 (29.6) |  | 5 (23.8) | 15 (28.8) |  |
| burdened | 7 (38.9) | 25 (43.9) |  | 16 (37.2) | 13 (46.4) | 3 (75.0) |  | 22 (45.8) | 10 (37.0) |  | 7 (33.3) | 25 (48.1) |  |
| less burdened | 2 (11.1) | 13 (22.8) |  | 8 (18.6) | 7 (25.0) | 0 (0.0) |  | 9 (18.8) | 6 (22.2) |  | 6 (28.6) | 8 (15.4) |  |
| not burdened | 4 (22.2) | 4 (7.0) |  | 5 (11.6) | 2 (7.1) | 1 (25.0) |  | 5 (10.4) | 3 (11.1) |  | 3 (14.3) | 4 (7.7) |  |
| NA=1 |  |  |  |  |  |  |  |  |  |  |  |  |  |
| **Co-student** |  |  | 0.447 |  |  |  | 1.071 |  |  | 0.043 |  |  | 0.316 |
| very burdened | 10 (55.6) | 34 (59.6) |  | 32 (74.4) | 11 (39.3) | 1 (25.0) |  | 28 (58.3) | 16 (59.3) |  | 12 (57.1) | 32 (61.5) |  |
| burdened | 4 (22.2) | 18 (31.6) |  | 7 (16.3) | 14 (50.0) | 1 (25.0) |  | 14 (29.2) | 8 (29.6) |  | 7 (33.3) | 14 (26.9) |  |
| less burdened | 2 (11.1) | 4 (7.0) |  | 4 (9.3) | 1 (3.6) | 1 (25.0) |  | 4 (8.3) | 2 (7.4) |  | 2 (9.5) | 4 (7.7) |  |
| not burdened | 2 (11.1) | 1 (1.8) |  | 0 (0.0) | 2 (7.1) | 1 (25.0) |  | 2 (4.2) | 1 (3.7) |  | 0 (0.0) | 2 (3.8) |  |
| NA=1 |  |  |  |  |  |  |  |  |  |  |  |  |  |
| **Material** |  |  | 0.374 |  |  |  | 0.960 |  |  | 0.504 |  |  | 0.339 |
| very burdened | 3 (16.7) | 3 (5.3) |  | 4 (9.3) | 2 (7.1) | 0 (0.0) |  | 4 (8.3) | 2 (7.4) |  | 1 (4.8) | 5 (9.6) |  |
| burdened | 5 (27.8) | 17 (29.8) |  | 12 (27.9) | 10 (35.7) | 0 (0.0) |  | 14 (29.2) | 8 (29.6) |  | 7 (33.3) | 14 (26.9) |  |
| less burdened | 5 (27.8) | 18 (31.6) |  | 15 (34.9) | 7 (25.0) | 1 (25.0) |  | 18 (37.5) | 5 (18.5) |  | 5 (23.8) | 18 (34.6) |  |
| not burdened | 5 (27.8) | 19 (33.3) |  | 12 (27.9) | 9 (32.1) | 3 (75.0) |  | 12 (25.0) | 12 (44.4) |  | 8 (38.1) | 15 (28.8) |  |
| NA=1 |  |  |  |  |  |  |  |  |  |  |  |  |  |
| **Quiet place** |  |  | 0.109 |  |  |  | 1.366 |  |  | 0.252 |  |  | 0.306 |
| very burdened | 7 (36.8) | 21 (36.8) |  | 18 (41.9) | 10 (34.5) | 0 (0.0) |  | 16 (33.3) | 12 (42.9) |  | 9 (42.9) | 19 (35.8) |  |
| burdened | 4 (21.1) | 14 (24.6) |  | 11 (25.6) | 7 (24.1) | 0 (0.0) |  | 11 (22.9) | 7 (25.0) |  | 3 (14.3) | 14 (26.4) |  |
| less burdened | 4 (21.1) | 12 (21.1) |  | 9 (20.9) | 5 (17.2) | 2 (50.0) |  | 11 (22.9) | 5 (17.9) |  | 5 (23.8) | 11 (20.8) |  |
| not burdened | 4 (21.1) | 10 (17.5) |  | 5 (11.6) | 7 (24.1) | 2 (50.0) |  | 10 (20.8) | 4 (14.3) |  | 4 (19.0) | 9 (17.0) |  |
| NA=0 |  |  |  |  |  |  |  |  |  |  |  |  |  |
| **Something else** |  |  | 0.713 |  |  |  | NaN |  |  | 1.088 |  |  | 1.014 |
| very burdened | 2 (66.7) | 5 (50.0) |  | 5 (62.5) | 2 (40.0) | 0 (NaN) |  | 3 (37.5) | 4 (80.0) |  | 2 (40.0) | 5 (62.5) |  |
| burdened | 1 (33.3) | 3 (30.0) |  | 2 (25.0) | 2 (40.0) | 0 (NaN) |  | 3 (37.5) | 1 (20.0) |  | 2 (40.0) | 2 (25.0) |  |
| less burdened | 0 (0.0) | 1 (10.0) |  | 1 (12.5) | 0 (0.0) | 0 (NaN) |  | 1 (12.5) | 0 (0.0) |  | 0 (0.0) | 1 (12.5) |  |
| not burdened | 0 (0.0) | 1 (10.0) |  | 0 (0.0) | 1 (20.0) | 0 (NaN) |  | 1 (12.5) | 0 (0.0) |  | 1 (20.0) | 0 (0.0) |  |
| NA=63 |  |  |  |  |  |  |  |  |  |  |  |  |  |

*Legend:* “During the COVID-19 pandemic, I experienced…”

Money: “…financing my student status as…”; Lecturer: “…lack of exchange with lecturers as…”; Co-student: “…lack of exchange with fellow students as…”; Material: “…lack of access to learning materials as…”; Quiet place: “…lack of access to undisturbed/quiet workplaces as…”; Something else: “…something else I would like mention as…”.

NA: not applicable; SMD: standard mean difference
